# Supplementary material for: Viral Entry Properties Required for Fitness in Humans Are Lost through Rapid Genomic Change during Viral Isolation
Source: PubMed Central journal article supplement (PMC6030562; doi:10.1128/mbio.00898-18), 2018-07-03
Supplement: mbo003183958st1.pdf [file mbo003183958st1.pdf]

Table S1. Sample metadata

| <b>Accession</b> | <b>Strain</b> | <b>Collection Date</b> | <b>Background</b> | <b>Collection Type</b> |
|------------------|---------------|------------------------|-------------------|------------------------|
| KY369862         | SC129         | 2016                   | Clinical Sample   | Nasal Swab             |
| KY369863         | SC161         | 2016                   | Clinical Sample   | Nasal Swab             |
| KY369864         | SC291         | 2016                   | Clinical Sample   | Nasal Swab             |
| KY369865         | SC789         | 2016                   | Clinical Sample   | Nasal Swab             |
| KY369866         | SC876         | 2016                   | Clinical Sample   | Nasal Swab             |
| KY369867         | SC1216        | 2016                   | Clinical Sample   | Nasal Swab             |
| KY369868         | SC139         | 2016                   | Clinical Sample   | Nasal Swab             |
| KY369869         | SC271         | 2016                   | Clinical Sample   | Nasal Swab             |
| KY369870         | SC332         | 2016                   | Clinical Sample   | Nasal Swab             |
| KY369871         | SC717         | 2016                   | Clinical Sample   | Nasal Swab             |
| KY369872         | SC9791        | 2016                   | Clinical Sample   | Nasal Swab             |
| KY369876         | SC113         | 2016                   | Clinical Sample   | Nasal Swab             |
| KY629772         | 16-J1         | 2016                   | Culture Isolate   | BAL                    |
| KY629774         | 16-J5         | 2016                   | Culture Isolate   | BAL                    |
| KY674922         | 16G3          | 2016                   | Culture Isolate   | Nasal Swab             |
| KY674923         | 9T9           | 2009                   | Culture Isolate   | BAL                    |
| KY674924         | 9T7           | 2009                   | Culture Isolate   | Nasal Wash             |
| KY674925         | 9T3           | 2009                   | Culture Isolate   | BAL                    |
| KY674926         | 9T2           | 2009                   | Culture Isolate   | Nasal Swab             |
| KY674927         | 9T8           | 2009                   | Culture Isolate   | Nasal Wash             |
| KY674928         | 9S5           | 2009                   | Culture Isolate   | Nasal Wash             |
| KY674929         | 9R4           | 2009                   | Culture Isolate   | Nasal Wash             |
| KY674930         | 9R3           | 2009                   | Culture Isolate   | Sputum                 |
| KY674931         | 9Q10          | 2009                   | Culture Isolate   | BAL                    |
| KY674932         | 9Q6           | 2009                   | Culture Isolate   | Nasal Wash             |
| KY674933         | 9Q4           | 2009                   | Culture Isolate   | Nasal Wash             |
| KY674934         | 9Q3           | 2009                   | Culture Isolate   | Nasal Wash             |
| KY674935         | 9Q2           | 2009                   | Culture Isolate   | BAL                    |
| KY674936         | 9Q1           | 2009                   | Culture Isolate   | BAL                    |
| KY674937         | 9P8           | 2009                   | Culture Isolate   | Nasal Wash             |
| KY674938         | 9P6           | 2009                   | Culture Isolate   | Nasal Wash             |
| KY674939         | 9P5           | 2009                   | Culture Isolate   | Nasal Wash             |
| KY674963         | 12M7          | 2012                   | Culture Isolate   | BAL                    |
| KY674964         | 12N3          | 2012                   | Culture Isolate   | Nasal Swab             |
| KY674975         | 16C7          | 2016                   | Culture Isolate   | Nasal Swab             |
| KY674977         | 16D1          | 2016                   | Culture Isolate   | Nasal Swab             |
| KY674978         | 16D10         | 2016                   | Culture Isolate   | BAL                    |
| KY674979         | 16E1          | 2016                   | Culture Isolate   | Nasal Swab             |

|          |        |      |                 |                               |
|----------|--------|------|-----------------|-------------------------------|
| KY674981 | 16E8   | 2016 | Culture Isolate | Nasal Swab<br>CAP Proficiency |
| KY674982 | 16F7   | 2016 | Culture Isolate | Testing                       |
| KY684744 | 9E7    | 2009 | Culture Isolate | Nasal Wash                    |
| KY684745 | 9C2    | 2009 | Culture Isolate | unknown                       |
| KY684746 | 9D2    | 2009 | Culture Isolate | Nasal Wash                    |
| KY684747 | 9F7    | 2009 | Culture Isolate | Nasal Wash                    |
| KY684748 | 9F8    | 2009 | Culture Isolate | Nasal Wash                    |
| KY684749 | 9G3    | 2009 | Culture Isolate | Nasal Wash                    |
| KY684750 | 9I8    | 2009 | Culture Isolate | Nasal Swab                    |
| KY684751 | 9I9    | 2009 | Culture Isolate | Nasal                         |
| KY684752 | 9K9    | 2009 | Culture Isolate | Nasal Wash                    |
| KY684753 | 9L10   | 2009 | Culture Isolate | Nasal Wash                    |
| KY684754 | 9M6    | 2009 | Culture Isolate | Nasal Wash                    |
| KY684755 | SC2155 | 2016 | Clinical Sample | Nasal Swab                    |
| KY684756 | SC2171 | 2016 | Clinical Sample | Nasal Swab                    |
| KY684761 | 9M7    | 2009 | Culture Isolate | unk                           |
| KY973568 | 10E1   | 2010 | Culture Isolate | BAL                           |
| KY973569 | SC3238 | 2015 | Clinical Sample | Nasal Swab                    |
| KY973570 | SC2565 | 2015 | Clinical Sample | Nasal Wash                    |
| KY973571 | SC2337 | 2015 | Clinical Sample | Nasal Swab                    |
| KY973572 | 10S2   | 2010 | Culture Isolate | Nasal Wash                    |
| KY973573 | 10Q8   | 2010 | Culture Isolate | BAL                           |
| KY973574 | 10Q7   | 2010 | Culture Isolate | BAL                           |
| KY973575 | 10P9   | 2010 | Culture Isolate | Nasal Swab                    |
| KY973576 | 10P1   | 2010 | Culture Isolate | Nasal Wash                    |
| KY973577 | 10N7   | 2010 | Culture Isolate | Nasal Wash                    |
| KY973578 | 10N6   | 2010 | Culture Isolate | Nasal Swab                    |
| KY973579 | 10M9   | 2010 | Culture Isolate | Nasal Wash                    |
| KY973580 | 10L8   | 2010 | Culture Isolate | BAL                           |
| KY973581 | 10L6   | 2010 | Culture Isolate | Nasal Wash                    |
| KY973582 | 10L5   | 2010 | Culture Isolate | Nasal Wash                    |
| KY973583 | 10L3   | 2010 | Culture Isolate | Nasal Wash                    |
| KY973584 | 10J10  | 2010 | Culture Isolate | Nasal Wash                    |
| KY973585 | 10J5   | 2010 | Culture Isolate | Nasal Wash                    |
| KY973586 | 10J4   | 2010 | Culture Isolate | Nasal Wash                    |
| KY973587 | 10J3   | 2010 | Culture Isolate | Nasal Wash                    |
| KY973588 | 10I8   | 2010 | Culture Isolate | Nasal Wash                    |

|          |        |      |                 |             |
|----------|--------|------|-----------------|-------------|
| KY973589 | 10I6   | 2010 | Culture Isolate | Throat Swab |
| KY973590 | 10I5   | 2010 | Culture Isolate | Nasal Wash  |
| KY973591 | 10I4   | 2010 | Culture Isolate | Nasal Swab  |
| KY973592 | 10H8   | 2010 | Culture Isolate | unknown     |
| KY973593 | 10G10  | 2010 | Culture Isolate | BAL         |
| KY973594 | 10F5   | 2010 | Culture Isolate | Nasal Wash  |
| KY973595 | 10F1   | 2010 | Culture Isolate | Nasal Wash  |
| KY973596 | 10E9   | 2010 | Culture Isolate | BAL         |
| KY973597 | 10E6   | 2010 | Culture Isolate | Nasal Wash  |
| KY973598 | 10E5   | 2010 | Culture Isolate | Nasal Wash  |
| KY973599 | 10E4   | 2010 | Culture Isolate | Nasal Wash  |
| KY973600 | 10E2   | 2010 | Culture Isolate | BAL         |
| KY986641 | 10J1   | 2010 | Culture Isolate | Nasal Wash  |
| KY986642 | 10K3   | 2010 | Culture Isolate | Nasal Wash  |
| KY986643 | 10L2   | 2010 | Culture Isolate | Nasal Wash  |
| MF166751 | SC3182 | 2015 | Clinical Sample | BAL         |
| MF166752 | SC3331 | 2015 | Clinical Sample | Nasal Swab  |
| MF554716 | 2D5    | 2009 | Culture Isolate | BAL         |
| MF554717 | 2A8    | 2009 | Culture Isolate | BAL         |
| MF554718 | 2T2    | 2009 | Culture Isolate | Nasal Wash  |
| MF554719 | 2T1    | 2009 | Culture Isolate | Nasal Wash  |
| MF554720 | 2P2    | 2009 | Culture Isolate | Nasal Wash  |
| MF554721 | 2P1    | 2009 | Culture Isolate | Nasal Wash  |
| MF554722 | 2O10   | 2009 | Culture Isolate | Nasal Wash  |
| MF554723 | 2O8    | 2009 | Culture Isolate | Nasal Wash  |
| MF554724 | 2O7    | 2009 | Culture Isolate | Nasal Wash  |
| MF554725 | 2F10   | 2009 | Culture Isolate | Nasal Wash  |
| MF554726 | 2F9    | 2009 | Culture Isolate | Nasal Wash  |
| MF554727 | 2F8    | 2009 | Culture Isolate | Nasal Wash  |
| MF554728 | 2F6    | 2009 | Culture Isolate | Nasal Wash  |
| MF554729 | 2D3    | 2009 | Culture Isolate | Nasal Wash  |
| MF554730 | 2C8    | 2009 | Culture Isolate | Nasal Wash  |
| MF554731 | 2C5    | 2009 | Culture Isolate | Nasal Wash  |
| MF554732 | 2B7    | 2009 | Culture Isolate | Nasal Wash  |
| MF554733 | 2B6    | 2009 | Culture Isolate | BAL         |
| MF554734 | 2B5    | 2009 | Culture Isolate | Nasal Swab  |
| MF554735 | 2B1    | 2009 | Culture Isolate | Nasal Wash  |
| MF554736 | 2E6    | 2009 | Culture Isolate | Nasal Wash  |
| MF795094 | SC1201 | 2015 | Clinical Sample | Nasal Wash  |
| MF795095 | SC1784 | 2015 | Clinical Sample | BAL         |

|          |        |      |                 |            |
|----------|--------|------|-----------------|------------|
| MF795096 | SC2711 | 2015 | Clinical Sample | Nasal Swab |
| MF795097 | SC2288 | 2015 | Clinical Sample | Nasal Swab |
| MF973163 | 7N2    | 2011 | Culture Isolate | Nasal Wash |
